# Supplementary material for: The evidence for services to avoid or delay residential aged care admission: a systematic review
Source: BMC Geriatr. 2019 Aug 8;19:217. doi: 10.1186/s12877-019-1210-3 (PMC6686247; doi:10.1186/s12877-019-1210-3)
Supplement: Supplementary file 2 — Table S1. Intervention elements. (DOCX 24 kb) [file 12877_2019_1210_MOESM2_ESM.docx]

**Additional File 2 Table S1 Intervention elements described**

|  | **Intervention**  **Element** | **Beland 2006** | **Byles 2004** | **Caplan 2004** | **Dalby 2000** | **Eloneumi-Sulkava 01** | **Eloneumi-Sulkava 09** | **Gill 2002** | **Hammar 2007** | **Hebert 2001** | **Holland 2005** | **Kono 2004** | **Kono 2012** | **Leneghan 2007** | **Luukinen 2006** | **Mahoney 2007** | **Markle-Reid2013** | **Nakanishi 2018** | **Newbury 2001** | **Pardessus 2002** | **Phung 2013** | **Rockwood 2000** | **Samus 2014** | **Scott 2004** | **Senior 2014** | **Shapiro 2002** | **Spice 2009** | **Spoorenberg 2018** | **Sommers 2000** | **Stuck 2000** | **Thomas 2007** | **Vass 2005** | **Van Hout 2010** |
| --- | --- | --- | --- | --- | --- | --- | --- | --- | --- | --- | --- | --- | --- | --- | --- | --- | --- | --- | --- | --- | --- | --- | --- | --- | --- | --- | --- | --- | --- | --- | --- | --- | --- |
| **Personnel** | General practitioners | X |  |  |  |  |  |  |  |  |  |  |  |  |  |  |  | X | X |  |  |  |  | X |  |  | X | X | X |  |  | X |  |
| Geriatricians, Physicians | X |  | X |  |  | X |  | X |  |  |  |  |  |  | X |  |  |  | X | X | X | X | X |  |  |  | X |  | X |  |  |  |
| Nurses | X | X | X | X | X | X |  | X | X |  | X | X |  | X | X | X | X | X |  | X | X | X |  | X | X | X | X | X | X | X |  | X |
| Occupational therapists | X | X | X |  |  |  |  |  |  |  |  |  |  | X |  | X |  |  | X |  | X |  |  | X |  |  |  |  |  |  |  |  |
| Physiotherapists | X | X | X |  |  |  | X |  |  |  |  |  |  | X | X | X | X |  |  |  | X |  |  | X |  |  |  |  |  |  |  |  |
| Dietitians | X |  |  |  |  |  |  |  |  |  |  |  |  |  |  | X |  |  |  |  | X |  |  |  |  |  |  |  |  |  |  |  |
| Social workers | X | X |  |  |  |  |  |  |  |  |  | X |  |  |  | X |  |  |  |  | X |  |  |  |  |  | X | X |  |  |  |  |
| Pharmacists | X |  |  |  |  |  |  |  |  | X |  |  | X |  |  |  |  |  |  |  |  |  |  |  |  |  |  |  |  |  |  |  |
| Psychologists |  | X |  |  |  |  |  |  |  |  |  |  |  |  |  |  |  |  |  |  |  |  |  |  |  |  |  |  |  |  |  |  |
| Speech pathologist |  |  |  |  |  |  |  |  |  |  |  |  |  |  |  | X |  |  |  |  | X |  |  |  |  |  |  |  |  |  |  |  |
| Audiologist |  |  |  |  |  |  |  |  |  |  |  |  |  |  |  | X |  |  |  |  | X |  |  |  |  |  |  |  |  |  |  |  |
| MultiD teams | X |  |  |  |  |  |  |  |  |  |  |  |  |  |  |  |  |  |  |  |  |  |  |  |  | X | X |  |  |  |  |  |
| Other support staff (aides, paid carers) | X |  |  |  |  |  |  | X |  |  |  |  |  |  |  | X | X |  |  |  |  |  |  | X |  |  |  |  |  |  |  |  |
| **Assessments** | Initial assessment | X | X | X | X | X | X | X | X | X | X | X | X | X | X | X | X | X | X | X | X | X | X | X | X | X | X | X | X | X | X |  | X |
| Review visits | X | X |  | X | X | X |  | X |  | X | X | X | X |  |  | X | X |  |  |  |  |  | X | X |  |  | X | X | X | X |  | X |
| Phone review |  | X |  | X | X |  | X |  | X |  |  |  |  | X | X |  |  |  | X | X |  | X |  | X |  | X |  | X |  |  |  |  |
| Home safety assessment |  | X |  | X |  |  | X |  |  |  | X |  |  |  | X |  |  |  | X |  |  |  |  | X |  | X |  | X |  |  |  |  |
| **Setting** | Client’s home | X | X | X | X | X | X | X | X | X | X | X | X | X | X | X | X | X |  | X | X | X | X |  | X | X | X | X | X | X | X |  | X |
| Hospital or ED | X |  | X |  |  | X |  | X |  |  |  |  |  |  |  |  |  |  | X |  |  |  |  |  |  |  |  |  |  |  |  |  |
| Health centre | X |  |  |  |  | X |  |  |  |  |  |  |  |  |  |  |  | X |  |  |  |  | X | X |  | X |  | X |  |  | X |  |
| **Intervention elements** | Case management | X |  |  | X | X | X |  | X |  |  |  |  |  |  |  | X | X |  |  |  |  | X |  | X | X |  | X |  |  |  |  | X |
| Referrals to other services | X |  | X | X |  | X |  | X | X |  |  |  |  |  | X | X | X |  |  |  |  | X |  | X |  | X | X |  |  | X |  | X |
| Care plan, recommendations | X |  | X | X | X | X |  | X |  |  | X | X |  |  |  | X | X |  |  |  |  | X |  | X | X |  | X | X | X |  |  | X |
| Liaison with GP | X | X | X | X | X | X |  |  | X | X |  |  | X |  | X |  |  | X |  |  | X |  |  | X |  |  | X |  |  |  |  |  |
| Medical interventions | X |  |  |  |  | X |  |  |  |  |  |  |  |  |  |  |  |  |  |  |  |  | X |  |  |  | X |  |  |  |  |  |
| Medication review |  |  |  |  |  |  |  |  |  | X |  |  | X |  |  |  |  |  |  |  |  |  |  |  |  |  |  |  |  |  |  |  |
| Nursing interventions |  |  | X | X |  |  |  |  |  |  | X |  |  |  |  |  |  |  |  |  |  |  | X |  |  |  |  |  |  |  |  |  |
| Physiotherapy & exercise interventions |  |  | X |  |  | X | X |  |  |  |  |  |  | X | X |  |  |  |  |  |  |  |  | X |  |  |  |  |  |  |  |  |
| Occupational therapy interventions |  |  | X |  |  |  |  |  |  |  |  |  |  | X |  |  |  |  |  |  |  |  |  | X |  |  |  |  |  |  |  |  |
| Individualized interventions | X |  | X |  | X | X |  |  |  |  |  |  |  |  |  |  | X |  |  |  | X |  |  |  |  |  | X |  |  |  |  |  |
| Hospital discharge planning |  |  | X |  |  |  |  | X |  |  |  |  |  |  |  |  |  |  |  |  |  |  |  | X |  |  |  |  |  |  |  |  |
| Personal care |  |  |  |  |  |  |  |  |  |  |  |  |  |  |  |  |  |  |  |  |  |  |  |  | X |  |  |  |  |  |  |  |
| Rehabilitation | X |  |  |  |  | X | X |  |  |  |  |  |  |  |  |  |  |  |  |  |  |  |  | X |  |  |  |  |  |  |  |  |
| Social or peer support | X |  |  |  |  | X |  |  |  |  |  |  |  |  |  |  |  |  |  | X |  |  | X |  |  |  |  |  |  |  |  |  |
| Dementia support |  |  |  |  | X | X |  |  |  |  |  |  |  |  |  |  | X |  |  |  |  | X |  |  |  |  |  |  |  |  |  |  |
| Carer support, respite |  |  |  |  | X | X |  |  |  |  | X |  |  |  |  |  |  |  |  | X |  |  |  |  | X |  |  |  |  |  |  |  |
| Counselling |  |  |  |  | X |  |  |  |  |  |  |  |  |  |  |  |  |  |  | X |  | X |  |  |  |  |  |  | X |  |  |  |
| Home help (homemaking) | X |  |  |  |  |  |  |  |  |  | X |  |  |  |  |  |  |  |  |  |  |  |  |  | X |  |  |  |  |  |  |  |
| Home delivered meals |  |  |  |  |  |  |  |  |  |  |  |  |  |  |  |  |  |  |  |  |  |  |  |  | X |  |  |  |  |  |  |  |
| Assistive/safety equip’t, medical supplies |  |  |  |  |  |  |  |  |  | X |  |  |  |  | X |  |  |  |  |  |  |  |  |  | X |  |  |  |  |  |  |  |
| Medical transport |  |  |  |  |  |  |  |  |  |  |  |  |  |  |  |  |  |  |  |  |  |  |  |  | X |  |  |  |  |  |  |  |
| Rapid response / on call | X |  |  |  | X |  |  |  |  |  |  |  |  |  |  |  |  |  |  |  |  |  |  |  |  |  |  |  |  |  |  |  |
| Education/training to patients/carers |  |  |  |  | X | X |  |  |  | X |  |  | X |  |  |  |  |  |  | X |  | X | X |  |  |  | X |  | X |  |  |  |
| Chronic disease self-management program |  |  |  |  |  |  |  |  |  |  |  |  |  |  |  |  |  |  |  |  |  |  |  |  |  |  | X | X |  |  |  |  |
| Information provision to patients/carers |  | X |  |  | X | X | X |  |  |  |  |  |  |  |  |  |  |  |  | X |  | X |  |  |  |  |  |  |  |  |  |  |
| Training for health professionals |  |  |  |  |  |  |  | X |  |  |  |  |  |  |  |  | X |  |  |  |  |  |  |  |  |  | x | X |  |  | X |  |
| Interventions unclear |  |  |  |  |  |  |  |  |  |  |  |  |  |  |  | X |  |  |  |  | X |  |  |  |  |  |  |  |  |  |  |  |
| **Decisions** | Client involved |  |  |  | X |  | X |  | X |  |  |  |  |  |  |  |  |  |  |  |  |  |  |  |  | X |  | X |  |  | X |  | X |
| Carer involved |  |  |  | X |  | X |  | X |  |  |  |  |  |  |  |  | X |  |  |  |  |  |  |  | X |  |  |  |  | X |  |  |
| Clinical team meetings |  |  | X |  |  |  |  |  |  |  |  |  |  |  |  |  | X |  |  |  | X |  |  |  |  |  | X | X | X |  |  |  |
| **Philosophy** | Integrated care across health sectors | X |  |  |  |  |  |  | X |  |  |  |  |  |  |  |  | X |  |  |  |  |  |  |  |  |  | X |  |  |  |  |  |
| Client-centered |  |  |  |  |  | X |  |  |  |  |  |  |  |  |  |  |  |  |  |  |  |  |  |  |  |  | X |  |  |  |  |  |
| Dementia specific |  |  |  |  | X | X |  |  |  |  |  |  |  |  |  |  | X |  |  | X |  | X |  |  |  |  |  |  |  |  |  |  |
| Applied EBP/ guideline | X |  |  |  |  |  |  |  |  |  |  |  |  |  |  | X |  |  |  |  |  |  |  |  |  |  |  |  |  |  |  | X |
| **Frequency of contact** | Annual or single |  | X |  |  |  |  |  |  |  |  |  |  |  |  |  |  |  | X | X |  |  |  |  |  |  |  |  |  |  | X |  |  |
| Monthly |  |  |  |  |  |  |  |  | X | X |  |  | X |  | X | X |  |  |  | X | X | X | X |  | X | X | X |  |  |  |  |  |
| 3 monthly |  | X |  |  |  |  |  |  |  |  | X |  |  |  |  |  |  |  |  |  |  |  |  |  |  |  |  |  | X |  |  | X |
| 6 monthly |  | X |  |  |  |  |  |  |  |  |  | X |  |  |  |  |  |  |  |  |  |  |  |  |  |  |  |  |  |  | X |  |
| Weekly - fortnightly |  |  | X |  |  |  | X |  |  |  |  |  |  | X |  |  |  |  |  |  |  |  |  |  |  |  |  |  |  |  |  |  |
| 6 weekly |  |  |  |  |  |  |  |  |  |  |  |  |  |  |  |  |  |  |  |  |  |  |  |  |  |  |  | X |  |  |  |  |
| Individual, could be very frequent | X |  |  | X | X | X |  |  |  |  |  |  |  |  |  |  | X |  |  |  |  |  |  | X |  |  | X |  |  |  |  |  |
| Unclear |  |  |  |  |  |  |  | X |  |  |  |  |  |  |  |  |  |  |  |  |  |  |  |  |  |  |  |  |  |  |  |  |
| **Length of Program** | 4 weeks |  |  | X |  |  |  |  |  |  |  |  |  |  |  |  |  |  |  |  |  |  |  |  |  |  |  |  |  |  |  |  |  |
| 8 weeks |  |  |  |  |  |  |  |  |  | X |  |  | X |  |  |  |  |  |  |  |  |  |  |  |  |  |  |  |  |  |  |  |
| 3 months |  |  |  |  |  |  |  |  |  |  |  |  |  |  |  |  |  |  |  |  | X |  |  |  |  |  |  |  |  |  |  |  |
| 6 months |  |  |  |  |  |  | X | X |  |  |  |  |  |  |  | X | X |  |  |  |  |  |  |  |  |  |  |  |  |  |  |  |
| 12 months |  |  |  |  |  |  |  |  | X |  |  |  |  |  | X | X |  |  | X | X |  |  |  |  |  | X | X |  |  |  |  |  |
| <14 months |  |  |  | X |  |  |  |  |  |  |  |  |  |  |  |  |  |  |  |  |  |  |  |  |  |  |  |  |  |  |  |  |
| 18 months |  |  |  |  |  |  |  |  |  |  | X |  |  |  |  |  |  |  |  |  |  | X |  |  | X |  |  |  |  |  |  | X |
| <2 years | X |  |  |  | X | X |  |  |  |  |  | X |  | X |  |  |  | X |  |  |  |  | X | X |  |  |  |  |  |  |  |  |
| 3 year |  | X |  |  |  |  |  |  |  |  |  |  |  |  |  |  |  |  |  |  |  |  |  |  |  |  |  | X | X |  | X |  |
| 4 year |  |  |  |  |  |  |  |  |  |  |  |  |  |  |  |  |  |  |  |  |  |  |  |  |  |  |  |  |  | X |  |  |
